# Supplementary material for: Somatic CAG expansion in Huntington's disease is dependent on the MLH3 endonuclease domain, which can be excluded via splice redirection
Source: PubMed Central journal article supplement — Nucleic Acids Res. 2021 Mar 22;49(7):3907–18. doi: 10.1093/nar/gkab152 (PMC8053082; doi:10.1093/nar/gkab152), 2021-03-22
Supplement: gkab152_supplemental_file.pdf [file gkab152_supplemental_file.pdf]

**Figure S1. Mouse *Mlh3* exon 6 splice exclusion results in a variant that lacks the endonuclease domain but otherwise maintains the same translational frame.**

**A**

**Mouse *Mlh3* locus**

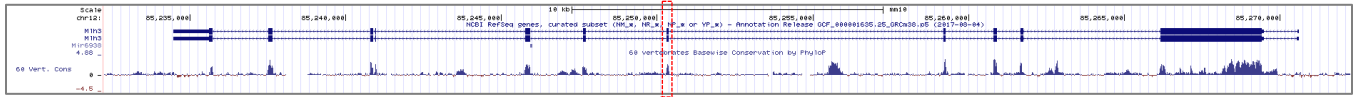

**B**

**Mouse *Mlh3* exon 6**

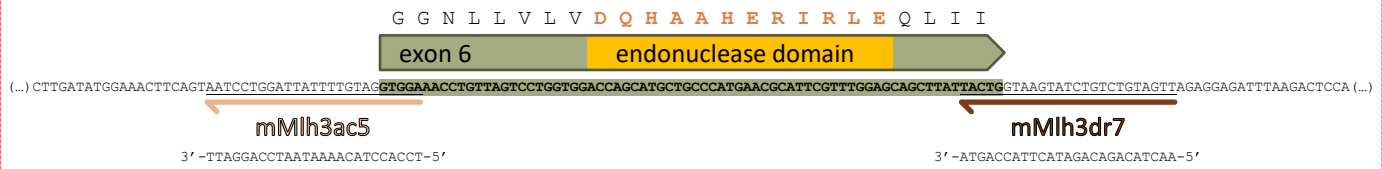

**C**

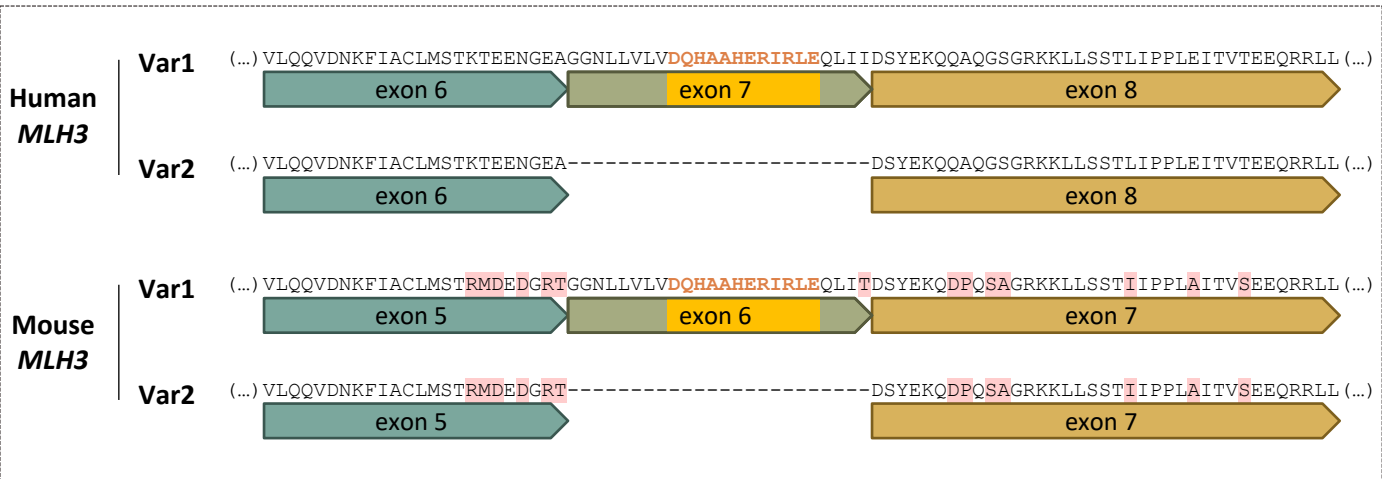

**(A)** Mouse *Mlh3* locus: chr12:85,232,251-85,272,250; GRCm38/mm10 assembly; NCBI RefSeq genes, curated subset; UCSC Genome Browser. **(B)** Splice redirection of mouse *Mlh3* using SSOs (mMlh3ac5 and mMlh3dr7) to exclude exon 6, which encodes the endonuclease domain (DQHAAHERIRLE). **(C)** Alignment of MLH3 protein isoforms encoded by human and mouse splice variants 1 and 2 (Var1 and Var2, respectively).

**Figure S2. Relative expression of mouse *Mlh3* splice variants 1 and 2 after splice redirection with SSOs.**

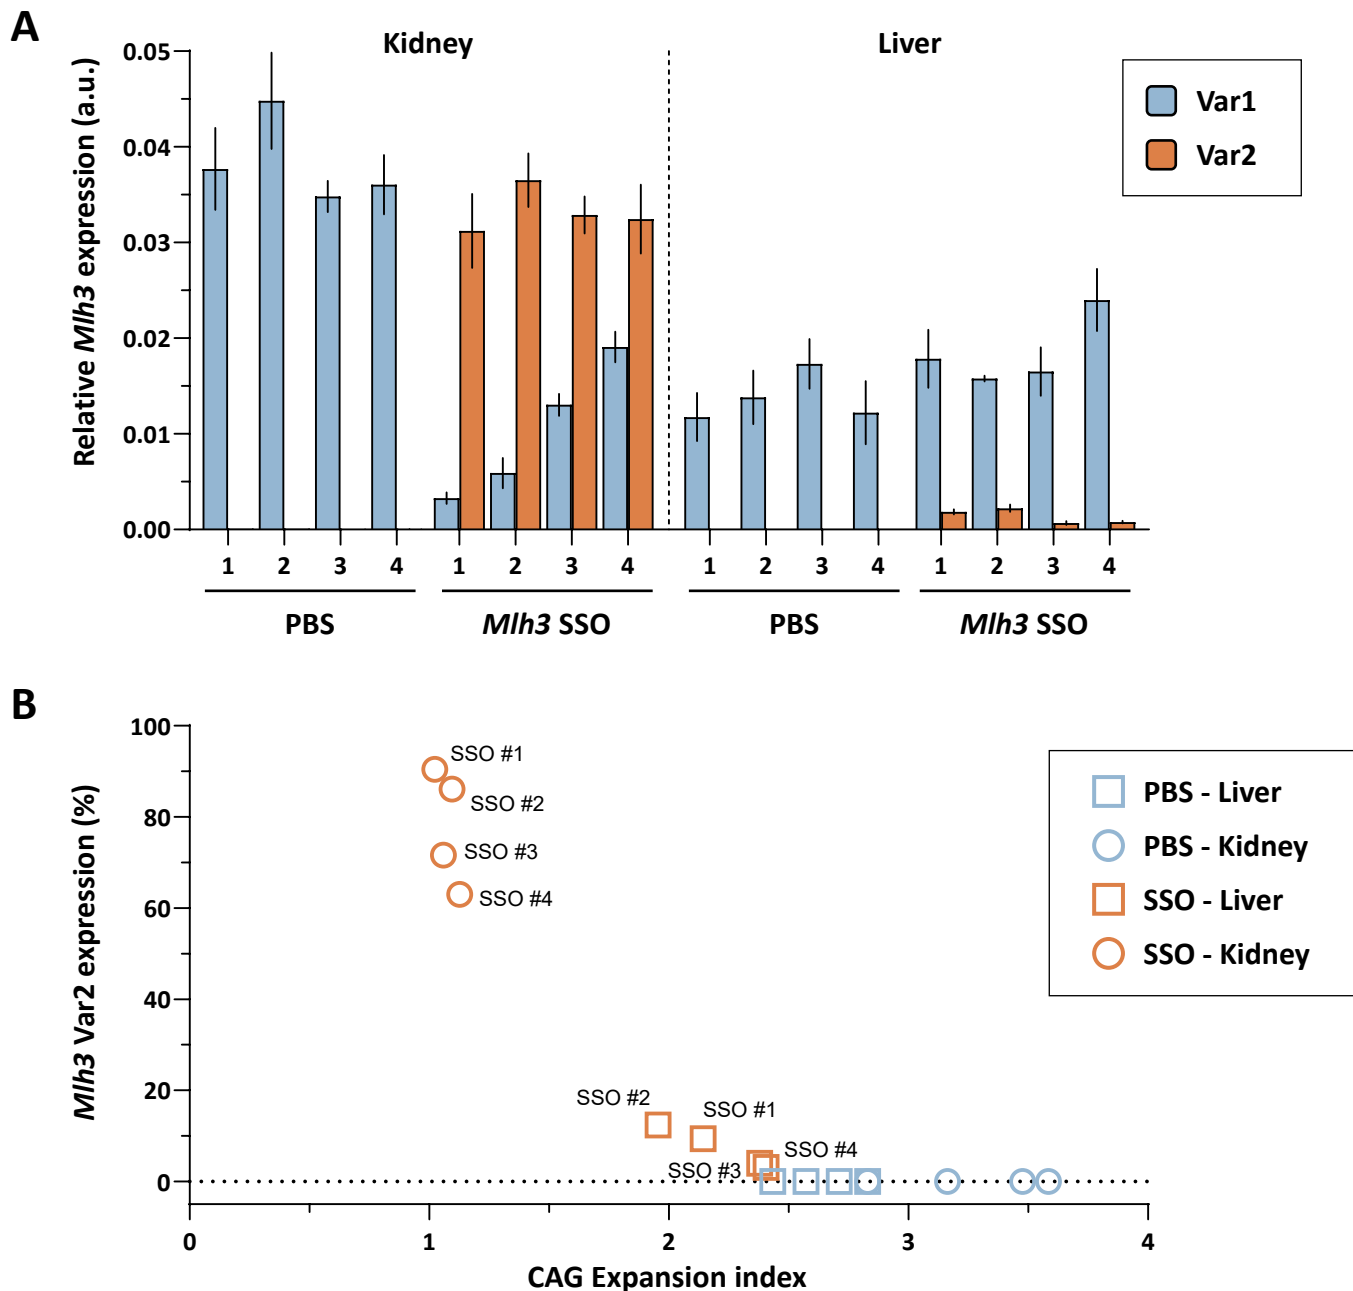

**(A)** Quantification of *Mlh3* splice variants by RT-qPCR in *Htt*<sup>Q111</sup> mice (CAG 104-109) at 12 weeks of age, following 8-week-long treatment with either 25 mg/kg *Mlh3* SSOs (mMLH3ac5 and mMLH3dr7, 1:1 ratio) or PBS. Tissue collection was performed 24hrs after the final tail-vein injection. *Mlh3* SSO treatment successfully induced splice redirection from variant 1 (Var1) to variant 2 (Var2) in the kidney and, to a lesser degree, in the liver. *Mlh3* expression is relative to endogenous mouse  $\beta$ -actin (*Actb*). Since *Actb* mRNA levels can vary across different mouse tissues, relative *Mlh3* expression cannot be directly compared between kidney and liver. Biological replicates,  $n = 4$  (two males and two females per group); technical replicates,  $n = 3$ ; error bars represent standard deviation of the mean. **(B)** Relative abundance of *Mlh3* Var2 (% Var2 relative to total Var1+Var2) correlates negatively with CAG expansion.

**Figure S3. Expression of human *MLH3* splice variants 1 and 2 across multiple tissues.**

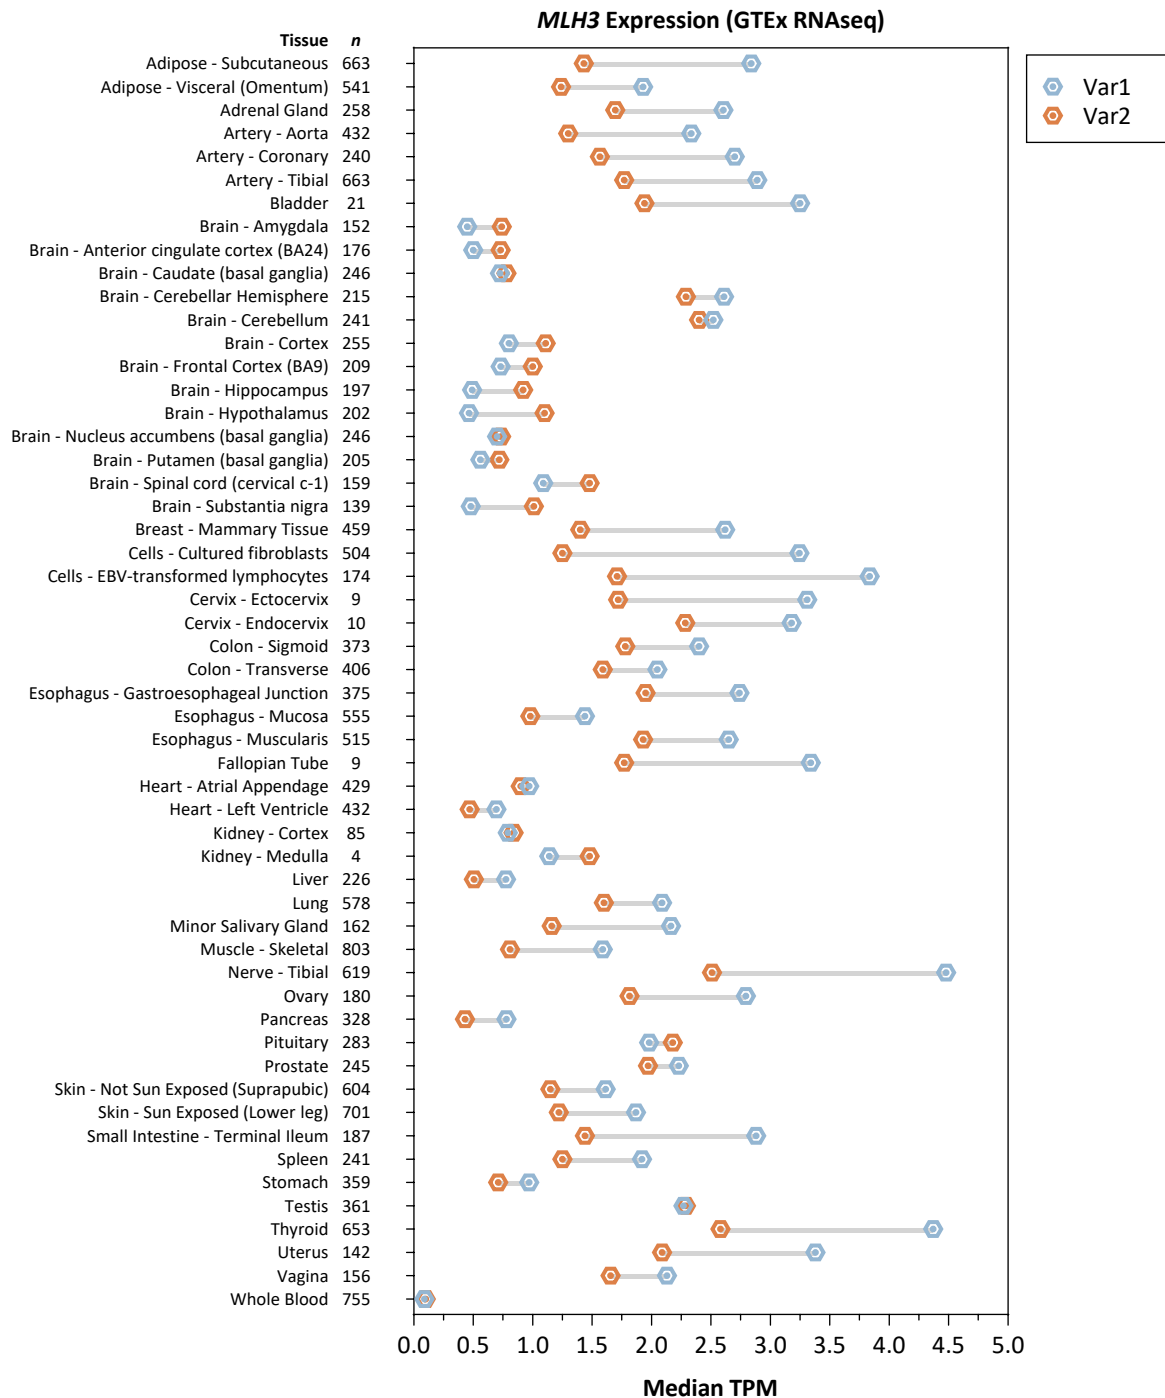

GTEx RNA-Seq data (analysis release V8, dbGaP Accession phs000424.v8.p2) was downloaded from the GTEx Portal on 07/08/2020 ([GTEx Analysis 2017-06-05 v8 RSEMv1.3.0 transcript tpm.gct.gz](https://gtex.org/analysis/2017-06-05_v8_RSEMv1.3.0_transcript_tpm.gct.gz)). The median transcript TPM (Transcripts Per Kilobase Million) was calculated for all annotated *MLH3* transcripts (Ensembl gene version ENSG00000119684.15) across all available samples ( $n = 17,382$  total samples;  $n = 4-803$  samples per tissue). *MLH3* variant 1 (Var1) was calculated by combining two transcripts (ENST00000355774.6 and ENST00000556740.5), both of which, encode the full-length *MLH3* protein isoform with the endonuclease domain (CCDS32123.1). *MLH3* variant 2 (Var2) represents a single transcript (ENST00000380968.6) that encodes the *MLH3* protein isoform lacking the endonuclease domain (CCDS9837.1). The remaining *MLH3* transcripts detected do not represent any human consensus coding sequence (CCDS) and were excluded from this analysis.

**Figure S4. *HTT* CAG repeat size distributions in HD patient-derived fibroblasts before and after six weeks of *MLH3* SSO treatment.**

**GM09197  
(CAG ~180)**

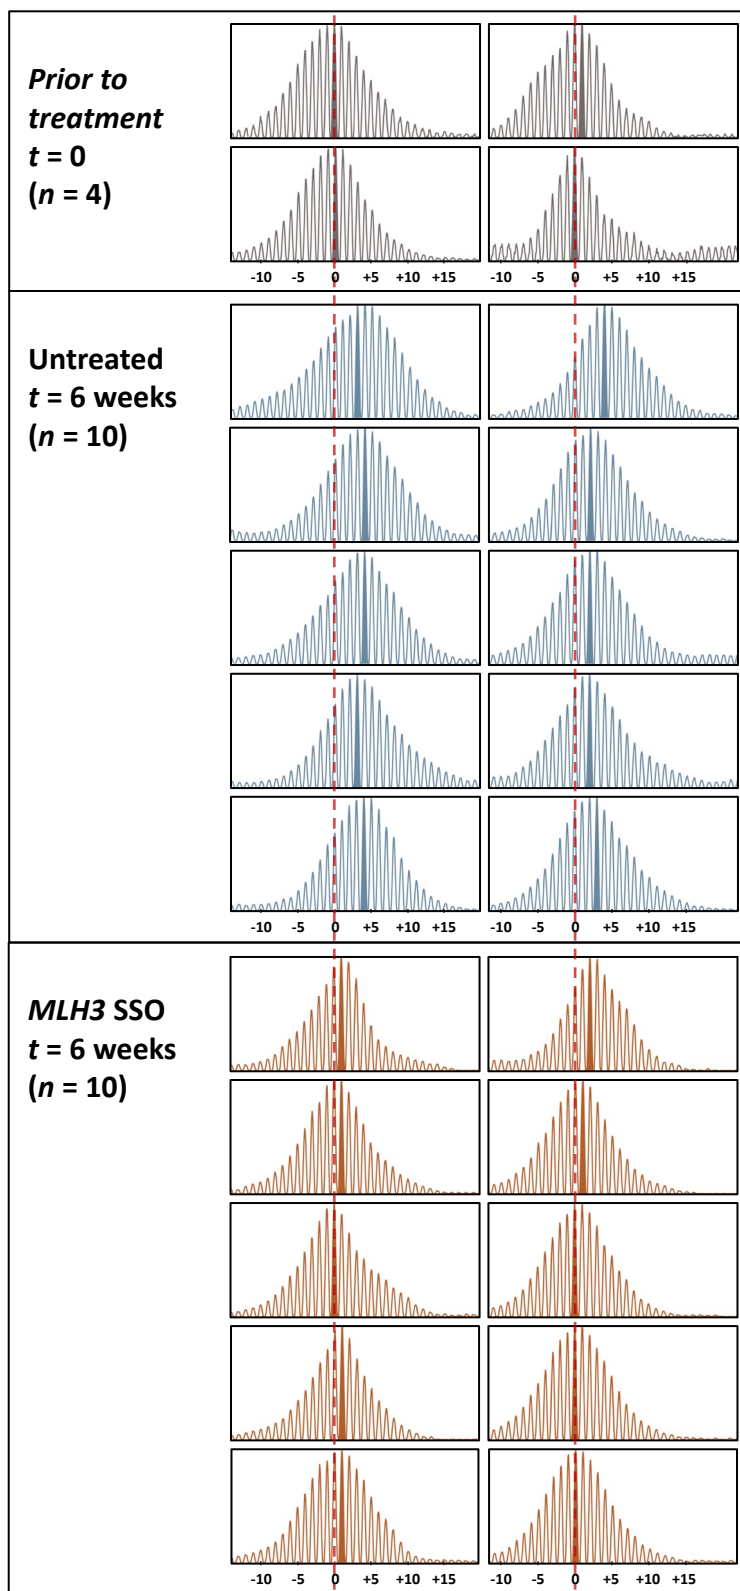

GeneMapper traces of *HTT* CAG repeat size distributions in primary HD fibroblasts (GM09197, CAG ~180) before ( $t = 0$ ) and after six weeks of CAG expansion induction by ectopic MSH3 expression ( $t = 6$  weeks). During this period, cells were either treated with *MLH3* SSOs two times per week, or left untreated. Solid peaks indicate the modal CAG allele. Red lines represent the modal CAG at  $t = 0$ .
